# Supplementary material for: Development of Bioactive Patch for Maintenance of Implanted Cells at the Myocardial Infarcted Site
Source: Hindawi journal article supplement (doi:10.1155/2015/804017), 2015-01-01
Supplement: f1 [file 804017.f1.pdf]

## SUPPLEMENTARY MATERIAL

### Materials and Methods

#### *Preparation of the poly(ethyl acrylate), PEA*

The monomer ethyl acrylate (99%, Sigma Aldrich) was mixed with 1 wt% of benzoin (98%, Scharlau) as photo-initiator and 2 wt% of ethyleneglycol dimethacrylate (98%, Sigma Aldrich) as cross-linker, injected in a porogen template, polymerized for 24h under a UV source, and post-polymerized for 24h more in an oven at 90°C. The porogenic templates consisted of 8 layers of nylon fabrics with a nominal thread diameter of 150µm and a mesh opening of 300µm (SAATI S.A.). Once polymerized, the nylon templates were removed by dissolution in nitric acid (30%, Sigma Aldrich) [1–3].

#### *Preparation of Poly(caprolactone 2-(methacryloyloxy)ethyl ester), PCLMA*

The CLMA monomeric mixture, with the same percentages of photo-initiator and cross-linker employed to prepare the PEA scaffolds, was injected in a porogen template obtained by sintering poly(methyl methacrylate) microspheres of  $90 \pm 10\mu\text{m}$  in diameter (PMMA; Colacryl dp 300). After polymerization, the porogen was eliminated by dissolution with acetone (Scharlab) yielding 0.8 mm-thick PEA and PCLMA scaffolds [4].

#### *Adipose tissue biopsy samples processing*

Adipose samples obtained from fat pads between skin and sternum were rinsed with PBS (Labclinics) and cut into small pieces, removing visible blood vessels; thereafter, cells were isolated by collagenase II (Gibco) digestion [5,6].

#### *Clonogenic assay*

Clonogenic assay was performed as previously described [7]. Briefly, cells were plated at a density of 400 cells/100 cm<sup>2</sup> and cloning rings were placed to encircle individual cells. Complete medium ( $\alpha$ -MEM + 20% FBS + 1% P/S) was added into the cloning rings and plates

were cultured under standard conditions. Clones were allowed to develop until they reach several mm in diameter.

#### *Immunosuppression assay*

To analyse the effect of subATDPCs on peripheral blood lymphocyte (PBL) proliferation,  $5 \times 10^3$  subATDPCs were plated with  $2 \times 10^5$  PBLs and in the presence or absence of the appropriate stimulus (PHA 5  $\mu\text{g/mL}$ ). After 4 days of stimulation, BrdU was added to the media for 24h and proliferation was determined by ELISA following the manufacturer's instructions (Cell proliferation ELISA BrdU, Roche). The experiment was conducted in triplicate. Data are shown relative to proliferation of PBLs without progenitor cells.

#### *Immunophenotypical analysis*

At passage 2, cells were collected and immunostained with specific mAbs against CD105 (Serotec), CD44, CD166, CD29, CD90, CD106, CD45 and CD14 (BD Pharmingen). Flow cytometry levels of each antigen were defined by the ratio between specific antibody and IgG isotype control (Caltag Laboratories) (1 = no difference). A coulter EPICS XL flow cytometer (Beckman Coulter) was used for all data acquisitions and analyses were carried out using the Expo32 software (Beckman Coulter).

#### *Adipogenic and osteogenic differentiation assays*

Expanded primary cell cultures were assessed for adipogenic and osteogenic potentials. Differentiation assays were performed as previously described [8]. Cells were then examined for the presence of lipid vacuoles staining with Oil red O (Sigma) and deposition of calcium matrix was examined by von Kossa staining.

#### *Myocardial infarction model.*

Myocardial infarction was created as previously described [9]. Briefly, the animals were intubated and anesthetized with a mixture of  $\text{O}_2$ /isoflurane and mechanically ventilated. The

heart was exposed and the left anterior descending (LAD) coronary artery was permanently occluded with an intramural stitch (7-0 silk suture). Sham-operated animals were prepared in a similar manner except that the LAD was not occluded. Mice were then randomly distributed into 2 experimental groups: sham and infarcted animals both with bioimplant.

### Supplementary References

- [1] Rodríguez Hernández J C, Serrano Aroca Á, Gómez Ribelles J L and Monleón Pradas M 2007 Three-Dimensional Nanocomposite Scaffolds With Ordered Cylindrical Orthogonal Pores *J. Biomed. Mater. Res.* **541**–9
- [2] Más Estellés J, Krakovsky I, Rodríguez Hernández J C, Piotrowska a. M and Monleón Pradas M 2007 Mechanical properties of porous crosslinked poly(ethyl-acrylate) for tissue engineering *J. Mater. Sci.* **42** 8629–35
- [3] Arnal-Pastor M, Vallés-Lluch A, Keicher M and Monleón Pradas M 2011 Coating typologies and constrained swelling of hyaluronic acid gels within scaffold pores. *J. Colloid Interface Sci.* **361** 361–9
- [4] Escobar Ivirico J, Costa Martínez E, Salmerón Sánchez M, Muñoz Criado I, Gómez Ribelles J and Monleón Pradas M 2007 Structure and Properties of Methacrylate-Endcapped Caprolactone Networks With Modulated Water Uptake for Biomedical Applications *J Biomed Mater Res PartB Appl Biomater.* **83** 266–75
- [5] Bayes-Genis A, Soler-Botija C, Farré J, Sepúlveda P, Raya A, Roura S, Prat-Vidal C, Gálvez-Montón C, Montero J A, Büscher D and Izpisua Belmonte J C 2010 Human progenitor cells derived from cardiac adipose tissue ameliorate myocardial infarction in rodents. *J Mol Cell Cardiol.* **49** 771–80
- [6] Martinez-Estrada O, Munoz-Santos Y, Julve J, Reina M and Vilaro S 2005 Human adipose tissue as a source of Flk-1+ cells: new method of differentiation and expansion. *Cardiovasc. Res.* **65** 328–33
- [7] McFarland D 2000 Preparation of pure cell cultures by cloning. *Methods Cell Sci* **22** 63–6
- [8] Roura S, Farré J, Soler-Botija C, Llach A, Hove-Madsen L, Cairó J J, Gòdia F, Cinca J and Bayes-Genis A 2006 Effect of aging on the pluripotential capacity of human CD105+ mesenchymal stem cells. *Eur. J. Heart Fail.* **8** 555–63
- [9] Rigol M, Solanes N, Farré J, Roura S, Roqué M, Berruezo A, Bellera N, Novensà L, Tamborero D, Prat-Vidal C, Huzman M A, Batlle M, Hoefsloot M, Sitges M, Ramírez J, Dantas A P, Merino A, Sanz G, Brugada J, Bayés-Genís A and Heras M 2010 Effects of adipose tissue-derived stem cell therapy after

myocardial infarction: impact of the route of administration. *J. Card. Fail.* **16**  
357–66

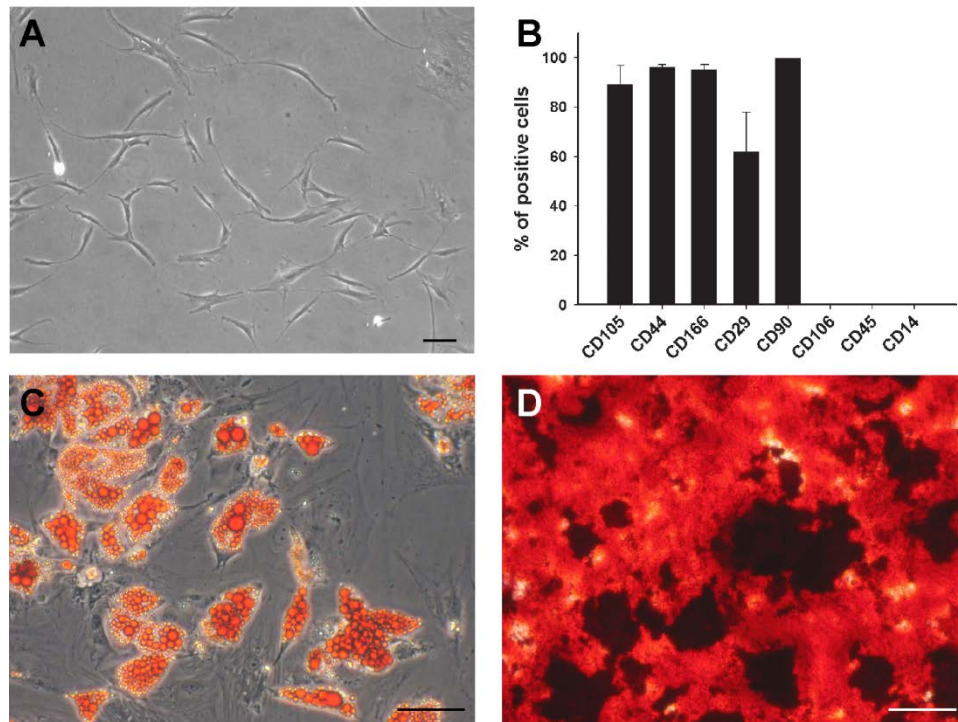

**Supplementary Figure 1: *In vitro* characterization of subATDPCs cultured in monolayer.** (A) SubATDPCs primary culture at pre-confluence at passage 2. (B) Flow cytometry analysis of subATDPCs immunophenotyping. (C) Oil Red O staining of subATDPCs cultured in adipogenic differentiation medium showing lipid droplets depositions (red). (D) Von Kossa staining of subATDPCs cultured in osteogenic differentiation medium with the presence of calcium depositions (red). Scale bars 100 $\mu$ m.

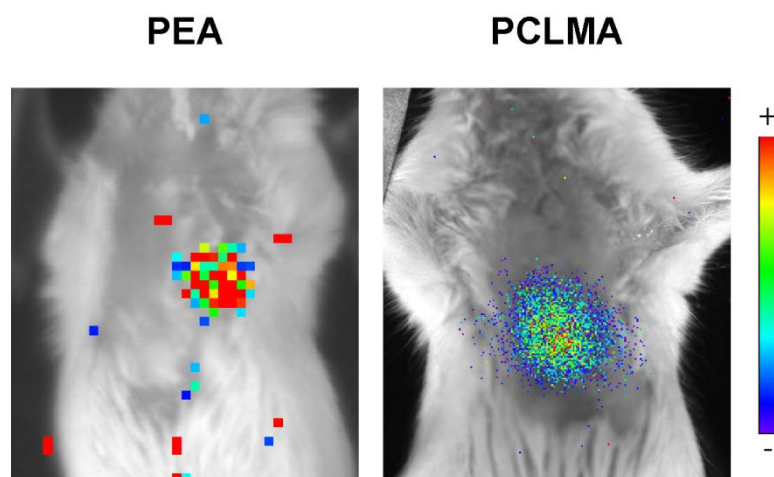

**Supplementary Figure 2: Non-invasive bioluminescence imaging for subATDPCs tracking in living mouse 3 days after implantation.** Representative bioluminescent images from constitutively labelled (CMVp-RLuc-mRFP1) subATDPCs within PEA (left) or PCLMA (right) bioimplants. Renilla luciferase images are superimposed on black and white dorsal images of recipient animal. Color bar illustrate the relative light intensities from RLuc: low, blue; high, red.

**Supplementary Table1:** Primers used to analyse gene expression by RT-PCR.

|   | NAME  |    | SEQUENCE                  | bp | Tm (°C) | Fragment |
|---|-------|----|---------------------------|----|---------|----------|
| 1 | Tbx5  | Fw | CATGGAGACATCACCCAGTG      | 20 | 60      | 169bp    |
|   |       | RV | GCAGCTGATGTCCTCTAGGC      | 20 |         |          |
| 2 | ACTN1 | Fw | GAGAAACTGCTGGAGACCATTGACC | 25 | 63      | 188bp    |
|   |       | RV | TTGTCGGCATCAGGGAGGGT      | 20 |         |          |
| 3 | MEF2C | Fw | CCATTGGACTCACCAGACCT      | 20 | 65      | 139bp    |
|   |       | RV | AGCACACACACACTGCAA        | 20 |         |          |
| 4 | TNNT2 | Fw | AGAGGCTGAGACCGAGGAGACCA   | 23 | 64      | 207bp    |
|   |       | RV | TGCAACTCATTGAGTCCTTCTCCA  | 25 |         |          |
| 5 | GJA1  | Fw | comercial QT00012684      | -  | 55      | 92bp     |
|   |       | RV |                           | -  |         |          |
| 6 | CDH1  | Fw | AGCCAAAGACAGAGCGGAAC      | 20 | 60      | 216bp    |
|   |       | RV | AAGCAGGCACTTGGGGATTTC     | 20 |         |          |
| 7 | SNAI1 | Fw | TAGCGAGTGGTTCTTCTGCG      | 20 | 60      | 164bp    |
|   |       | RV | AGGGCTGCTGGAAGGTAAAC      | 20 |         |          |
